# Supplementary material for: OXPAT/PAT-1 Is a PPAR-Induced Lipid Droplet Protein That Promotes Fatty Acid Utilization
Source: Oxford University Press journal article supplement (doi:10.2337/db06-0399), 2006-11-28
Supplement: pg3418table1.doc [file pg3418table1.doc]

**Supplemental Table 1: quantitative RT-PCR primers for mouse genes**

**Accession**

**Gene Number Sequence**

**OXPAT BC024138 fwd: GTGATCAGACAGCTCAGGACCCT**

**rev: CGATTCACCACATTCTGCTGG**

**Acadm NM_007382 fwd: GGAAATGATCAACAAAAAAAGTATTT**

**rev: ATGGCCGCCACATCAGA**

**Acadvl NM_017366 fwd: ATCTCTGCCCAGCGACTTT**

**rev: TTCTGGCTTGTCCAGAACTG**

**Cox2** [DQ106413](http://www.ncbi.nlm.nih.gov/entrez/viewer.fcgi?db=nuccore&val=68349600) **fwd:** TGAAGACGTCCTCCACTCATG

**rev:** CCCTGGTCGCTTTGATGTTA

**Cox4** NM_009941 **fwd:** TACTTCGGTGTGCCTTCGA

**rev:** TGACATGGGCCACATCAG

**Sdha** NM_023281 fwd: GTTGGCGCAGTTTCGAGGCT

rev: GCCGCAGGTCTGTTTTTGGA

**Ucp1 NM_009463 fwd: CGACTCAGTCCAAGAGTACTTCTCTTC**

**rev: GCCGGCTGAGATCTTGTTTC**

**36B4** NM_007475 **fwd: gcagacaacgtgggctccaagcagat**

**rev: ggtcctccttggtgaacacgaagccc**
