# Supplementary material for: OXPAT/PAT-1 Is a PPAR-Induced Lipid Droplet Protein That Promotes Fatty Acid Utilization
Source: Oxford University Press journal article supplement (doi:10.2337/db06-0399), 2006-11-28
Supplement: pg3418table2.doc [file pg3418table2.doc]

**Supplemental Table 2: quantitative RT-PCR primers for human genes**

**Accession**

**Gene Number Sequence**

**OXPAT not available fwd:** AGCTGGTGGATCACTTCCTG

**rev:** CCTGCTGTCTCCTCTGATCC

**Perilipin BC031084 fwd:** CCTGCCTTACATGGCTTGTT

**rev:** CCTTTGTTGACTGCCATCCT

**S3-12** XM_375558 **fwd:** TGCTGCAGAATGAGTTGGAG **rev:** GACCCAGGTCACCTAAACGA

**TIP47** NM_005817 **fwd:** GCTGGACAAGTTGGAGGAGA

**rev:** CCGACACCTTAGACGACACA

**18S** X03205 **fwd:** TTCGAACGTCTGCCCTATCAA

**rev:**  ATGGTAGGCACGGCGACTA
